# Supplementary material
Source: PubMed Central journal article supplement (PMC5239750)
Supplement: NIHMS833017-supplement-supplement_1.pdf [file NIHMS833017-supplement-supplement_1.pdf]

**Supplemental Table 1. Treatment variables evaluated, by primary cancer diagnosis**

| Primary Cancer Diagnosis     | Treatment variables                                                                                                                                                                                                                                                                                                                                                                  |
|------------------------------|--------------------------------------------------------------------------------------------------------------------------------------------------------------------------------------------------------------------------------------------------------------------------------------------------------------------------------------------------------------------------------------|
| Acute lymphoblastic leukemia | Cranial radiation (yes, no)<br>Anthracyclines ( $\geq 250$ mg/m <sup>2</sup> , < 250 mg/m <sup>2</sup> )<br>Alkylating agents ( $\geq 6000$ mg/m <sup>2</sup> , < 6000 mg/m <sup>2</sup> )<br>High dose methotrexate (yes/no)<br>Dexamethasone (yes, no)<br>Prednisone (yes, no)                                                                                                     |
| Astrocytoma, medulloblastoma | Cranial radiation (yes, no)<br>Alkylating agents ( $\geq 6000$ mg/m <sup>2</sup> , < 6000 mg/m <sup>2</sup> )<br>Vincristine (yes, no)<br>Prednisone (yes, no)                                                                                                                                                                                                                       |
| Hodgkin lymphoma             | Chest radiation ( $\geq 30$ Gy, < 30 Gy)<br>Splenectomy (yes/no)<br>Anthracyclines ( $\geq 250$ mg/m <sup>2</sup> )<br>Alkylating agents ( $\geq 7,700$ mg/m <sup>2</sup> )<br>Bleomycin (yes/no)                                                                                                                                                                                    |
| Non-Hodgkin lymphoma         | Cranial radiation (yes, no)<br>Anthracyclines ( $\geq 250$ mg/m <sup>2</sup> , < 250 mg/m <sup>2</sup> )<br>Alkylating agents ( $\geq 6000$ mg/m <sup>2</sup> , < 6000 mg/m <sup>2</sup> )<br>High dose methotrexate (yes/no)<br>Dexamethasone (yes, no)<br>Prednisone (yes, no)                                                                                                     |
| Wilms tumor                  | Abdominal/flank radiation (yes, no)<br>Anthracyclines ( $\geq 250$ mg/m <sup>2</sup> , < 250 mg/m <sup>2</sup> )<br>Vincristine (yes, no)                                                                                                                                                                                                                                            |
| Neuroblastoma                | Cranial radiation (yes, no)<br>Chest radiation (yes, no)<br>Abdominal radiation (yes, no)<br>Pelvic radiation (yes, no)<br>Anthracyclines ( $\geq 250$ mg/m <sup>2</sup> , < 250 mg/m <sup>2</sup> )<br>Alkylating agents ( $\geq 6000$ mg/m <sup>2</sup> , < 6000 mg/m <sup>2</sup> )<br>Cisplatin (yes, no)<br>Autologous transplant (yes, no)                                     |
| Soft tissue sarcoma          | Cranial radiation (yes, no)<br>Chest radiation (yes, no)<br>Abdominal radiation (yes, no)<br>Pelvic radiation (yes, no)<br>Anthracyclines ( $\geq 250$ mg/m <sup>2</sup> , < 250 mg/m <sup>2</sup> )<br>Alkylating agents ( $\geq 6000$ mg/m <sup>2</sup> , < 6000 mg/m <sup>2</sup> )<br>Vincristine (yes, no)<br>Methotrexate (yes, no)<br>Amputation (yes, limb sparing, neither) |
| Ewing sarcoma                | Chest radiation (yes, no)<br>Pelvic radiation (yes, no)<br>Anthracyclines ( $\geq 250$ mg/m <sup>2</sup> , < 250 mg/m <sup>2</sup> )<br>Methotrexate (yes, no)<br>Dexamethasone (yes, no)<br>Amputation (yes, limb sparing, neither)                                                                                                                                                 |
| Osteosarcoma                 | Chest radiation (yes, no)<br>Pelvic radiation (yes, no)<br>Anthracyclines ( $\geq 250$ mg/m <sup>2</sup> , < 250 mg/m <sup>2</sup> )<br>Alkylating agents ( $\geq 6000$ mg/m <sup>2</sup> , < 6000 mg/m <sup>2</sup> )<br>High dose methotrexate (yes/no)<br>Vincristine (yes, no)<br>Dexamethasone (yes, no)<br>Bleomycin (yes, no)<br>Amputation (yes, limb sparing, neither)      |

Gy=Gray, mg=milligrams, m<sup>2</sup>=square meters

**Supplemental Table 2. Grade 3 and 4 chronic health conditions scored according to Common Terminology Criteria of Adverse Events (CTCAE) v4.03 with adaptations**

| Category         | Chronic Condition            | Grade 3 Definition                                                                                                                                                                                                        | Grade 4 Definition                                                                                                                                         |
|------------------|------------------------------|---------------------------------------------------------------------------------------------------------------------------------------------------------------------------------------------------------------------------|------------------------------------------------------------------------------------------------------------------------------------------------------------|
| Vision and Eye   | Cataract                     | <ul style="list-style-type: none"> <li>• Cataracts, requiring surgery</li> </ul>                                                                                                                                          | <ul style="list-style-type: none"> <li>• Not applicable</li> </ul>                                                                                         |
|                  | Blindness                    | <ul style="list-style-type: none"> <li>• Legally blind in only one eye</li> </ul>                                                                                                                                         | <ul style="list-style-type: none"> <li>• Legally blind in both eyes or loss of an eye</li> </ul>                                                           |
| Hearing          | Loss of Hearing              | <ul style="list-style-type: none"> <li>• Hearing loss requiring a hearing aid</li> <li>• Deafness in one ear not completely corrected by hearing aid</li> </ul>                                                           | <ul style="list-style-type: none"> <li>• Deafness in both ears not completely corrected by hearing aid</li> </ul>                                          |
| Speech           |                              | <ul style="list-style-type: none"> <li>• Aphonia</li> </ul>                                                                                                                                                               | <ul style="list-style-type: none"> <li>• Not applicable</li> </ul>                                                                                         |
| Pulmonary        | Emphysema                    | <ul style="list-style-type: none"> <li>• Emphysema, requiring medication</li> </ul>                                                                                                                                       | <ul style="list-style-type: none"> <li>• Not applicable</li> </ul>                                                                                         |
|                  | Pulmonary fibrosis           | <ul style="list-style-type: none"> <li>• Requiring oxygen therapy</li> </ul>                                                                                                                                              | <ul style="list-style-type: none"> <li>• Not applicable</li> </ul>                                                                                         |
|                  | Other respiratory conditions | <ul style="list-style-type: none"> <li>• Primary pulmonary hypertension</li> </ul>                                                                                                                                        | <ul style="list-style-type: none"> <li>• Chronic respiratory failure</li> <li>• Respiratory arrest</li> <li>• Respirator dependency status</li> </ul>      |
| Cardiovascular   | Coronary artery disease      | <ul style="list-style-type: none"> <li>• Myocardial infarction, angina, or coronary heart disease not requiring a cardiac catheterization but on anti-anginal medication</li> </ul>                                       | <ul style="list-style-type: none"> <li>• Myocardial infarction, requiring cardiac catheterization, angioplasty, or coronary artery bypass graft</li> </ul> |
|                  | Congestive heart failure     | <ul style="list-style-type: none"> <li>• Congestive heart failure, requiring medication</li> </ul>                                                                                                                        | <ul style="list-style-type: none"> <li>• Heart transplant</li> </ul>                                                                                       |
|                  | Arrhythmia                   | <ul style="list-style-type: none"> <li>• Arrhythmia , requiring pacemaker</li> </ul>                                                                                                                                      | <ul style="list-style-type: none"> <li>• Ventricular fibrillation/flutter</li> </ul>                                                                       |
|                  | Valvular heart disease       | <ul style="list-style-type: none"> <li>• Not applicable</li> </ul>                                                                                                                                                        | <ul style="list-style-type: none"> <li>• Heart valve replacement</li> </ul>                                                                                |
|                  | Stroke                       | <ul style="list-style-type: none"> <li>• Occlusion of cerebral arteries</li> </ul>                                                                                                                                        | <ul style="list-style-type: none"> <li>• Stroke / Cerebrovascular Accident (CVA)</li> </ul>                                                                |
|                  | Pericardial disease          | <ul style="list-style-type: none"> <li>• Pericardial disease requiring surgical intervention</li> </ul>                                                                                                                   | <ul style="list-style-type: none"> <li>• Not applicable</li> </ul>                                                                                         |
|                  | Other cardiac conditions     | <ul style="list-style-type: none"> <li>• Thromboangiitis obliterans (Buerger’s disease)</li> <li>• Hypotension, unspecified</li> <li>• Other chronic pulmonary heart diseases</li> </ul>                                  | <ul style="list-style-type: none"> <li>• Not applicable</li> </ul>                                                                                         |
|                  | Thromboembolic disease       | <ul style="list-style-type: none"> <li>• Blood clot in head, lung, arm, leg, or pelvis, NOS</li> </ul>                                                                                                                    | <ul style="list-style-type: none"> <li>• Pulmonary embolism and infarction</li> <li>• Embolism and thrombosis of unspecified artery</li> </ul>             |
|                  | Other vascular conditions    | <ul style="list-style-type: none"> <li>• Aorta-subclavian-carotid bypass</li> <li>• Other (peripheral) vascular shunt or bypass</li> <li>• Other repair of aneurysm</li> <li>• Repair of arteriovenous fistula</li> </ul> | <ul style="list-style-type: none"> <li>• Other excision of vessels, aorta, abdominal (aorta)</li> </ul>                                                    |
|                  | Hypertension                 | <ul style="list-style-type: none"> <li>• Hypertensive chronic kidney disease</li> <li>• Hypertensive heart disease</li> </ul>                                                                                             | <ul style="list-style-type: none"> <li>• Not applicable</li> </ul>                                                                                         |
| Gastrointestinal | Hepatitis                    | <ul style="list-style-type: none"> <li>• Cirrhosis</li> </ul>                                                                                                                                                             | <ul style="list-style-type: none"> <li>• Liver transplant</li> </ul>                                                                                       |
|                  | Intestinal obstruction       | <ul style="list-style-type: none"> <li>• Surgery for intestinal obstruction</li> </ul>                                                                                                                                    | <ul style="list-style-type: none"> <li>• Not applicable</li> </ul>                                                                                         |

|                 |                               |                                                                                                                                                                                                                                                                                                                                                                                                                                                                                                                                                                                                                                                                                                                                                                         |                                                                                                                       |
|-----------------|-------------------------------|-------------------------------------------------------------------------------------------------------------------------------------------------------------------------------------------------------------------------------------------------------------------------------------------------------------------------------------------------------------------------------------------------------------------------------------------------------------------------------------------------------------------------------------------------------------------------------------------------------------------------------------------------------------------------------------------------------------------------------------------------------------------------|-----------------------------------------------------------------------------------------------------------------------|
| Renal           | Renal failure                 | <ul style="list-style-type: none"> <li>• Not applicable</li> </ul>                                                                                                                                                                                                                                                                                                                                                                                                                                                                                                                                                                                                                                                                                                      | <ul style="list-style-type: none"> <li>• Dialysis or kidney transplant</li> </ul>                                     |
|                 | Urinary incontinence          | <ul style="list-style-type: none"> <li>• Neurogenic bladder</li> </ul>                                                                                                                                                                                                                                                                                                                                                                                                                                                                                                                                                                                                                                                                                                  | <ul style="list-style-type: none"> <li>• Not applicable</li> </ul>                                                    |
|                 | Other renal conditions        | <ul style="list-style-type: none"> <li>• Nephrotic syndrome with unspecified pathological lesion in kidney</li> </ul>                                                                                                                                                                                                                                                                                                                                                                                                                                                                                                                                                                                                                                                   | <ul style="list-style-type: none"> <li>• Rupture of bladder, non-traumatic</li> </ul>                                 |
| Musculoskeletal | Amputation                    | <ul style="list-style-type: none"> <li>• Total ostectomy, femur</li> <li>• Disarticulation of elbow</li> <li>• Amputation through humerus, Upper arm amputation</li> <li>• Disarticulation of shoulder</li> <li>• Interthoracoscapular amputation, Forequarter amputation</li> <li>• Disarticulation of knee</li> <li>• Amputation above knee, Amputation of leg through femur, Amputation of thigh</li> <li>• Disarticulation of hip</li> <li>• Abdominopelvic amputation, Hemipelvectomy, Hindquarter amputation</li> <li>• Lower leg or ankle reattachment, reattachment of leg NOS</li> <li>• Traumatic amputation of arm and hand (complete) (partial), unilateral, at or above elbow</li> <li>• Upper limb amputation</li> <li>• Lower limb amputation</li> </ul> | <ul style="list-style-type: none"> <li>• Not applicable</li> </ul>                                                    |
|                 | Joint replacement             | <ul style="list-style-type: none"> <li>• Joint replacement</li> </ul>                                                                                                                                                                                                                                                                                                                                                                                                                                                                                                                                                                                                                                                                                                   | <ul style="list-style-type: none"> <li>• Not applicable</li> </ul>                                                    |
| Neurological    | Balance                       | <ul style="list-style-type: none"> <li>• Problems with balance or ability to manipulate objects, severe</li> </ul>                                                                                                                                                                                                                                                                                                                                                                                                                                                                                                                                                                                                                                                      | <ul style="list-style-type: none"> <li>• Problems with balance or ability to manipulate objects, disabling</li> </ul> |
|                 | Paralysis                     | <ul style="list-style-type: none"> <li>• Disorders of accessory [11th] nerve</li> </ul>                                                                                                                                                                                                                                                                                                                                                                                                                                                                                                                                                                                                                                                                                 | <ul style="list-style-type: none"> <li>• Paralysis</li> </ul>                                                         |
|                 | Other neurological conditions | <ul style="list-style-type: none"> <li>• Intracranial ventricular shunt or anastomosis</li> <li>• Ventricular shunt to abdominal cavity and organs</li> <li>• Irrigation and exploration of ventricular shunt</li> <li>• Replacement of ventricular shunt</li> <li>• Multiple sclerosis</li> <li>• Difficulty in walking</li> </ul>                                                                                                                                                                                                                                                                                                                                                                                                                                     | <ul style="list-style-type: none"> <li>• Coma</li> </ul>                                                              |
| Hematologic     |                               | <ul style="list-style-type: none"> <li>• Not applicable</li> </ul>                                                                                                                                                                                                                                                                                                                                                                                                                                                                                                                                                                                                                                                                                                      | <ul style="list-style-type: none"> <li>• Aplastic anemia</li> </ul>                                                   |
| Endocrine       | Thyroid Nodules               | <ul style="list-style-type: none"> <li>• Thyroid nodules, requiring surgery</li> </ul>                                                                                                                                                                                                                                                                                                                                                                                                                                                                                                                                                                                                                                                                                  | <ul style="list-style-type: none"> <li>• Not applicable</li> </ul>                                                    |
|                 | Diabetes                      | <ul style="list-style-type: none"> <li>• Diabetes requiring insulin</li> </ul>                                                                                                                                                                                                                                                                                                                                                                                                                                                                                                                                                                                                                                                                                          | <ul style="list-style-type: none"> <li>• Not applicable</li> </ul>                                                    |
|                 | Gonadal Dysfunction           | <ul style="list-style-type: none"> <li>• Post ablative ovarian failure or testicular hypo- function</li> <li>• Premature menopause, onset &lt;40 years of age</li> <li>• Absence of menstruation, onset &lt;40 years of age</li> <li>• Ovarian failure</li> <li>• Female infertility, associated with anovulation</li> </ul>                                                                                                                                                                                                                                                                                                                                                                                                                                            | <ul style="list-style-type: none"> <li>• Not applicable</li> </ul>                                                    |

|                     |                          |                                                                                                                                                                                            |                                                                                                                             |
|---------------------|--------------------------|--------------------------------------------------------------------------------------------------------------------------------------------------------------------------------------------|-----------------------------------------------------------------------------------------------------------------------------|
|                     |                          | <ul style="list-style-type: none"> <li>• Female infertility, unspecified origin</li> <li>• Other ovarian failure</li> <li>• Azoospermia</li> <li>• Male infertility unspecified</li> </ul> |                                                                                                                             |
|                     | Other Hormone Conditions | <ul style="list-style-type: none"> <li>• Pan hypopituitarism</li> <li>• Diabetes insipidus</li> <li>• Corticoadrenal insufficiency</li> <li>• Glucocorticoid deficiency</li> </ul>         | <ul style="list-style-type: none"> <li>• Not applicable</li> </ul>                                                          |
| Secondary Neoplasms | Secondary Neoplasms      | <ul style="list-style-type: none"> <li>• Thyroid carcinoma</li> <li>• Benign meningiomas requiring resection</li> <li>• Lobular cancer in situ of the breast</li> </ul>                    | <ul style="list-style-type: none"> <li>• Invasive malignancies</li> <li>• Ductal carcinoma in situ of the breast</li> </ul> |

**Supplemental Table 3. Treatment and chronic conditions by decade - Acute Lymphoblastic Leukemia**

| Treatment                      | 1970-1979<br>(N=1361) |        | 1980-1989<br>(N=1714) |        | 1990-1999<br>(N=2544) |        |
|--------------------------------|-----------------------|--------|-----------------------|--------|-----------------------|--------|
|                                | N                     | %      | N                     | %      | N                     | %      |
| Cranial radiation              | 1088                  | 82.8   | 849                   | 50.4   | 606                   | 23.9   |
| Mean (SD) dose (cGy)           | 2333                  | (537)  | 1985                  | (485)  | 1919                  | (572)  |
| Alkylating agent*              | 514                   | 37.8   | 982                   | 57.6   | 1584                  | 62.6   |
| Mean (SD) (mg/m <sup>2</sup> ) | 7935                  | (7267) | 6412                  | (6036) | 4774                  | (6152) |
| Anthracycline†                 | 488                   | 35.9   | 1152                  | 67.6   | 2134                  | 84.3   |
| Mean (SD) (mg/m <sup>2</sup> ) | 289                   | (163)  | 185                   | (193)  | 144                   | (155)  |
| High dose methotrexate‡        | 33                    | 2.4    | 416                   | 24.3   | 1036                  | 40.7   |
| Prednisone                     | 1322                  | 97.2   | 1612                  | 94.1   | 2212                  | 86.9   |
| Dexamethasone                  | 75                    | 5.5    | 313                   | 18.3   | 1211                  | 47.6   |
| Chronic condition grade 3-4    | 247                   | 18.1   | 214                   | 12.5   | 368                   | 14.5   |

SD=Standard deviation, cGy=centigray, mg=milligrams, m<sup>2</sup>=squared meters, N=number, %=percent

\*cumulative alkylating agent dose in cyclophosphamide equivalents (27) †cumulative anthracycline dose in doxorubicin equivalents (17); ‡High dose methotrexate cumulative intravenous dose  $\geq$  4300 mg/m<sup>2</sup>

**Supplemental Table 4. Treatment and chronic conditions by decade - Astrocytoma**

| Treatment                      | 1970-1979<br>(N=369) |        | 1980-1989<br>(N=501) |        | 1990-1999<br>(N=763) |        |
|--------------------------------|----------------------|--------|----------------------|--------|----------------------|--------|
|                                | N                    | %      | N                    | %      | N                    | %      |
| Cranial radiation              | 202                  | 58.0   | 220                  | 45.5   | 199                  | 26.4   |
| Mean (SD) dose (cGy)           | 5157                 | (551)  | 5555                 | (868)  | 5311                 | (1026) |
| Alkylating agent*              | 33                   | 9.0    | 67                   | 13.5   | 68                   | 9.0    |
| Mean (SD) (mg/m <sup>2</sup> ) | 4513                 | (9243) | 5017                 | (5637) | 11950                | (8094) |
| Prednisone                     | 9                    | 2.5    | 14                   | 2.8    | 8                    | 1.0    |
| Vincristine                    | 29                   | 7.9    | 62                   | 12.4   | 100                  | 13.1   |
| Chronic condition grade 3-4    | 180                  | 48.8   | 159                  | 31.7   | 186                  | 24.4   |

SD=Standard deviation, cGy=centigray, mg=milligrams, m<sup>2</sup>=squared meters, N=number, %=percent

\*cumulative alkylating agent dose in cyclophosphamide equivalents (27)

**Supplemental Table 5. Treatment and chronic conditions by decade - Medulloblastoma**

| Treatment                      | 1970-1979<br>(N=107) |        | 1980-1989<br>(N=156) |        | 1990-1999<br>(N=257) |        |
|--------------------------------|----------------------|--------|----------------------|--------|----------------------|--------|
|                                | N                    | %      | N                    | %      | N                    | %      |
| Cranial radiation              | 99                   | 98.0   | 139                  | 93.9   | 231                  | 90.2   |
| Mean (SD) dose (cGy)           | 5100                 | (694)  | 5447                 | (1171) | 5539                 | (724)  |
| Alkylating agent*              | 40                   | 37.4   | 89                   | 58.2   | 203                  | 79.3   |
| Mean (SD) (mg/m <sup>2</sup> ) | 3096                 | (4136) | 7130                 | (6397) | 12361                | (8591) |
| Prednisone                     | 24                   | 22.4   | 33                   | 21.3   | 2                    | 0.8    |
| Vincristine                    | 40                   | 37.4   | 92                   | 59.4   | 208                  | 80.9   |
| Chronic condition grade 3-4    | 57                   | 53.3   | 65                   | 41.7   | 125                  | 48.6   |

SD=Standard deviation, cGy=centigray, mg=milligrams, m<sup>2</sup>=squared meters, N=number, %=percent

\*cumulative alkylating agent dose in cyclophosphamide equivalents (27)

**Supplemental Table 6. Treatment and chronic conditions by decade - Hodgkin Lymphoma**

| Treatment                      | 1970-1979<br>(N=824) |        | 1980-1989<br>(N=827) |        | 1990-1999<br>(N=771) |        |
|--------------------------------|----------------------|--------|----------------------|--------|----------------------|--------|
|                                | N                    | %      | N                    | %      | N                    | %      |
| Chest radiation                | 683                  | 85.2   | 657                  | 81.9   | 517                  | 67.9   |
| Mean (SD) dose (cGy)           | 3766                 | (725)  | 3312                 | (970)  | 2753                 | (770)  |
| Alkylating agent*              | 501                  | 60.9   | 560                  | 68.0   | 544                  | 71.8   |
| Mean (SD) (mg/m <sup>2</sup> ) | 8411                 | (5544) | 7475                 | (4079) | 7425                 | (5210) |
| Anthracycline†                 | 92                   | 11.2   | 360                  | 43.7   | 666                  | 87.9   |
| Mean (SD) (mg/m <sup>2</sup> ) | 304                  | (124)  | 209                  | (88)   | 191                  | (70)   |
| Bleomycin                      | 38                   | 4.7    | 311                  | 38.9   | 483                  | 63.7   |
| Splenectomy                    | 614                  | 74.7   | 470                  | 57.9   | 64                   | 9.3    |
| Chronic condition grade 3-4    | 319                  | 38.7   | 185                  | 22.4   | 138                  | 17.9   |

SD=Standard deviation, cGy=centigray, mg=milligrams, m<sup>2</sup>=squared meters, N=number, %=percent

\*cumulative alkylating agent dose in cyclophosphamide equivalents (27), †cumulative anthracycline dose in doxorubicin equivalents (17)



**Supplemental Table 7. Treatment and chronic conditions by decade - Non-Hodgkin Lymphoma**

| Treatment                           | 1970-1979<br>(N=347) |        | 1980-1989<br>(N=517) |        | 1990-1999<br>(N=566) |        |
|-------------------------------------|----------------------|--------|----------------------|--------|----------------------|--------|
|                                     | N                    | %      | N                    | %      | N                    | %      |
| Cranial radiation                   | 91                   | 27.4   | 80                   | 15.8   | 49                   | 8.7    |
| Mean (SD) dose (cGy)                | 2753                 | (850)  | 2464                 | (860)  | 1925                 | (1033) |
| Alkylating agent <sup>*</sup>       | 290                  | 84.3   | 487                  | 94.4   | 517                  | 91.8   |
| Mean (SD) (mg/m <sup>2</sup> )      | 9834                 | (9712) | 8515                 | (7260) | 7163                 | (6664) |
| Anthracycline <sup>†</sup>          | 154                  | 44.8   | 372                  | 72.1   | 494                  | 87.6   |
| Mean (SD) (mg/m <sup>2</sup> )      | 402                  | (765)  | 274                  | (120)  | 193                  | (98)   |
| High dose methotrexate <sup>‡</sup> | 29                   | 8.4    | 77                   | 14.9   | 210                  | 37.1   |
| Prednisone                          | 299                  | 86.9   | 442                  | 85.5   | 433                  | 76.5   |
| Dexamethasone                       | 21                   | 6.1    | 57                   | 11.0   | 125                  | 22.1   |
| Chronic condition grade 3-4         | 96                   | 27.7   | 116                  | 22.4   | 87                   | 15.4   |

SD=Standard deviation, cGy=centigray, mg=milligrams, m<sup>2</sup>=squared meters, N=number, %=percent

<sup>\*</sup>cumulative alkylating agent dose in cyclophosphamide equivalents (27), <sup>†</sup>cumulative anthracycline dose in doxorubicin equivalents (17), <sup>‡</sup>high dose methotrexate cumulative intravenous dose  $\geq$  4300 mg/m<sup>2</sup>

**Supplemental Table 8. Treatment and chronic conditions by decade - Wilms Tumor**

| Treatment                      | 1970-1979<br>(N=398) |       | 1980-1989<br>(N=259) |       | 1990-1999<br>(N=427) |       |
|--------------------------------|----------------------|-------|----------------------|-------|----------------------|-------|
|                                | N                    | %     | N                    | %     | N                    | %     |
| Abdominal radiation            | 304                  | 79.2  | 128                  | 51.0  | 204                  | 48.1  |
| Mean (SD) dose (cGy)           | 2784                 | (755) | 1748                 | (708) | 1350                 | (651) |
| Anthracycline*                 | 103                  | 26.0  | 129                  | 50.0  | 233                  | 54.6  |
| Mean (SD) (mg/m <sup>2</sup> ) | 272                  | (95)  | 228                  | (82)  | 189                  | (93)  |
| Vincristine                    | 336                  | 84.8  | 251                  | 96.9  | 418                  | 97.9  |
| Chronic condition grade 3-4    | 84                   | 21.1  | 37                   | 14.3  | 41                   | 9.6   |

SD=Standard deviation, cGy=centigray, mg=milligrams, m<sup>2</sup>=squared meters, N=number, %=percent

\*cumulative anthracycline dose in doxorubicin equivalents (17)

**Supplemental Table 9. Treatment and chronic conditions by decade - Neuroblastoma**

| Treatment                          | 1970-1979<br>(N=289) |         | 1980-1989<br>(N=177) |        | 1990-1999<br>(N=247) |        |
|------------------------------------|----------------------|---------|----------------------|--------|----------------------|--------|
|                                    | N                    | %       | N                    | %      | N                    | %      |
| Cranial radiation                  | 13                   | 4.6     | 19                   | 11.0   | 26                   | 10.6   |
| Mean (SD) dose (cGy)               | 3073                 | (1714)  | 2550                 | (1743) | 1453                 | (665)  |
| Chest radiation                    | 81                   | 28.4    | 23                   | 13.3   | 37                   | 15.1   |
| Mean (SD) dose (cGy)               | 2368                 | (878)   | 2116                 | (1155) | 1613                 | (677)  |
| Abdominal radiation                | 115                  | 40.4    | 31                   | 17.9   | 56                   | 22.9   |
| Mean (SD) dose (cGy)               | 2288                 | (985)   | 2120                 | (1185) | 1910                 | (861)  |
| Pelvic radiation                   | 68                   | 23.9    | 19                   | 11.0   | 36                   | 14.7   |
| Mean (SD) dose (cGy)               | 2218                 | (927)   | 1700                 | (871)  | 1651                 | (719)  |
| Alkylating agent*                  | 183                  | 63.3    | 96                   | 55.2   | 137                  | 56.1   |
| Mean (SD) (mg/m <sup>2</sup> )     | 15609                | (16263) | 8845                 | (6601) | 9434                 | (7929) |
| Anthracycline <sup>†</sup>         | 41                   | 14.2    | 74                   | 42.5   | 125                  | 51.4   |
| Mean (SD) (mg/m <sup>2</sup> )     | 349                  | (160)   | 185                  | (90)   | 193                  | (99)   |
| Cisplatin                          | 4                    | 1.4     | 65                   | 37.1   | 113                  | 46.1   |
| Hematopoietic stem cell transplant | 1                    | 0.3     | 14                   | 7.9    | 37                   | 15.0   |
| Chronic condition grade 3-4        | 72                   | 24.9    | 50                   | 28.2   | 57                   | 23.1   |

SD=Standard deviation, cGy=centigray, mg=milligrams, m<sup>2</sup>=squared meters, N=number, %=percent

\*cumulative alkylating agent dose in cyclophosphamide equivalents (27), <sup>†</sup>cumulative anthracycline dose in doxorubicin equivalents (17)

**Supplemental Table 10. Treatment and chronic conditions by decade - Rhabdomyosarcoma**

| Treatment                      | 1970-1979<br>(N=287) |         | 1980-1989<br>(N=233) |        | 1990-1999<br>(N=232) |         |
|--------------------------------|----------------------|---------|----------------------|--------|----------------------|---------|
|                                | N                    | %       | N                    | %      | N                    | %       |
| Cranial radiation              | 74                   | 27.1    | 68                   | 29.7   | 64                   | 27.8    |
| Mean (SD) dose (cGy)           | 4992                 | (928)   | 4449                 | (1416) | 4554                 | (1184)  |
| Chest radiation                | 31                   | 11.4    | 21                   | 9.2    | 20                   | 8.7     |
| Mean (SD) dose (cGy)           | 3713                 | (1333)  | 3295                 | (1318) | 2234                 | (1306)  |
| Abdominal radiation            | 36                   | 13.2    | 31                   | 13.5   | 23                   | 10.0    |
| Mean (SD) dose (cGy)           | 3731                 | (1161)  | 3803                 | (1400) | 3139                 | (1483)  |
| Pelvic radiation               | 77                   | 28.2    | 56                   | 24.5   | 39                   | 16.9    |
| Mean (SD) dose (cGy)           | 4337                 | (1155)  | 4413                 | (1009) | 4212                 | (1257)  |
| Alkylating agent*              | 250                  | 87.1    | 181                  | 78.4   | 190                  | 81.9    |
| Mean (SD) (mg/m <sup>2</sup> ) | 19360                | (14228) | 15288                | (9064) | 21640                | (10032) |
| Anthracycline <sup>†</sup>     | 110                  | 38.3    | 136                  | 58.4   | 74                   | 31.9    |
| Mean (SD) (mg/m <sup>2</sup> ) | 339                  | (158)   | 360                  | (114)  | 294                  | (134)   |
| Amputation                     | 5                    | 1.7     | 1                    | 0.4    | 3                    | 1.3     |
| Chronic condition grade 3-4    | 128                  | 44.6    | 89                   | 38.2   | 66                   | 28.4    |

SD=Standard deviation, cGy=centigray, mg=milligrams, m<sup>2</sup>=squared meters, N=number, %=percent

\*cumulative alkylating agent dose in cyclophosphamide equivalents (27), <sup>†</sup>cumulative anthracycline dose in doxorubicin equivalents (17)

**Supplemental Table 11. Treatment and chronic conditions by decade - Ewing Sarcoma**

| Treatment                      | 1970-1979<br>(N=142) |        | 1980-1989<br>(N=198) |        | 1990-1999<br>(N=181) |        |
|--------------------------------|----------------------|--------|----------------------|--------|----------------------|--------|
|                                | N                    | %      | N                    | %      | N                    | %      |
| Chest radiation                | 41                   | 30.1   | 39                   | 20.1   | 39                   | 21.7   |
| Mean (SD) dose (cGy)           | 3048                 | (1625) | 3487                 | (1471) | 2738                 | (1751) |
| Pelvic radiation               | 24                   | 17.6   | 46                   | 23.7   | 37                   | 20.6   |
| Mean (SD) dose (cGy)           | 4833                 | (1035) | 5032                 | (978)  | 4482                 | (1533) |
| Anthracycline*                 | 104                  | 73.2   | 189                  | 95.5   | 180                  | 99.4   |
| Mean (SD) (mg/m <sup>2</sup> ) | 361                  | (96)   | 376                  | (133)  | 349                  | (100)  |
| Dexamethasone                  | 1                    | 0.7    | 27                   | 13.6   | 35                   | 19.3   |
| Vincristine                    | 136                  | 95.8   | 198                  | 100    | 177                  | 97.8   |
| Amputation                     | 15                   | 10.6   | 23                   | 11.6   | 18                   | 9.9    |
| Chronic condition grade 3-4    | 46                   | 32.4   | 67                   | 33.8   | 49                   | 27.1   |

SD=Standard deviation, cGy=centigray, mg=milligrams, m<sup>2</sup>=squared meters, N=number, %=percent

\*cumulative anthracycline dose in doxorubicin equivalents (17)

**Supplemental Table 12. Treatment and chronic conditions by decade - Osteosarcoma**

| Treatment                      | 1970-1979<br>(N=295) |        | 1980-1989<br>(N=375) |        | 1990-1999<br>(N=302) |        |
|--------------------------------|----------------------|--------|----------------------|--------|----------------------|--------|
|                                | N                    | %      | N                    | %      | N                    | %      |
| Chest radiation                | 24                   | 8.2    | 3                    | 0.8    | 2                    | 0.7    |
| Mean (SD) dose (Gy)            | 2476                 | (1745) | 3600                 | (2263) | 5650                 | (5445) |
| Pelvic radiation               | 4                    | 1.4    | 2                    | 0.5    | 3                    | 1.0    |
| Mean (SD) dose (Gy)            | 5425                 | (2748) | 3400                 | (2263) | 3950                 | (2899) |
| Alkylating agent*              | 140                  | 47.6   | 267                  | 71.2   | 213                  | 70.5   |
| Mean (SD) (mg/m <sup>2</sup> ) | 5713                 | (2932) | 6932                 | (9482) | 9621                 | (5692) |
| Anthracycline†                 | 240                  | 81.6   | 326                  | 86.9   | 283                  | 93.7   |
| Mean (SD) (mg/m <sup>2</sup> ) | 389                  | (135)  | 365                  | (147)  | 370                  | (103)  |
| High dose methotrexate‡        | 168                  | 56.9   | 228                  | 60.8   | 202                  | 66.9   |
| Dexamethasone                  | 7                    | 2.4    | 62                   | 16.5   | 45                   | 14.9   |
| Vincristine                    | 173                  | 58.8   | 146                  | 38.9   | 18                   | 6.0    |
| Bleomycin                      | 37                   | 12.8   | 189                  | 52.9   | 28                   | 9.3    |
| Amputation                     | 236                  | 80.3   | 193                  | 51.5   | 69                   | 22.8   |
| Chronic condition grade 3-4    | 260                  | 88.1   | 279                  | 74.4   | 197                  | 65.2   |

SD=Standard deviation, cGy=centigray, mg=milligrams, m<sup>2</sup>=squared meters, N=number, %=percent

\*cumulative alkylating agent dose in cyclophosphamide equivalents (27), †cumulative anthracycline dose in doxorubicin equivalents (17), ‡high dose methotrexate cumulative intravenous dose ≥ 4300 mg/m<sup>2</sup>

**Supplemental Table 13. Percent of survivors with adverse health status outcomes and relative risk (RR) with 95% confidence intervals (95% CI) for adverse health status outcomes for the comparison of outcomes for survivors within treatment decade to all siblings. Cancer-related pain and anxiety outcomes limited to survivors with 1970-79 as a reference group.**

| <b>Outcome</b>         | <b>Decade</b> | <b>Total N</b> | <b>%</b> | <b>RR</b> | <b>95% CI</b> |
|------------------------|---------------|----------------|----------|-----------|---------------|
| Poor general health    | Siblings      | 3149           | 5.4      | 1.0       |               |
|                        | 1970-79       | 4618           | 11.2     | 2.1       | (1.8, 2.5)    |
|                        | 1980-89       | 4669           | 11.7     | 2.3       | (2.0, 2.7)    |
|                        | 1990-99       | 5279           | 13.7     | 2.6       | (2.2, 3.1)    |
| Functional impairment  | Siblings      | 3149           | 2.7      | 1.0       |               |
|                        | 1970-79       | 4618           | 12.7     | 4.8       | (3.8, 6.1)    |
|                        | 1980-89       | 4669           | 12.1     | 4.9       | (3.9, 6.1)    |
|                        | 1990-99       | 5279           | 11.8     | 4.5       | (3.6, 5.6)    |
| Activity limitation    | Siblings      | 3149           | 6.0      | 1.0       |               |
|                        | 1970-79       | 4618           | 12.8     | 2.5       | (2.1, 2.9)    |
|                        | 1980-89       | 4669           | 11.8     | 2.3       | (1.9, 2.6)    |
|                        | 1990-99       | 5279           | 12.6     | 2.4       | (2.0, 2.8)    |
| Poor mental health     | Siblings      | 3149           | 10.1     | 1.0       |               |
|                        | 1970-79       | 4618           | 17.5     | 1.8       | (1.6, 2.1)    |
|                        | 1980-89       | 4669           | 17.4     | 1.7       | (1.5, 2.0)    |
|                        | 1990-99       | 5279           | 18.0     | 1.8       | (1.6, 2.0)    |
| Any of above 4 domains | Siblings      | 3149           | 18.0     | 1.0       |               |
|                        | 1970-79       | 4618           | 33.1     | 1.9       | (1.8, 2.1)    |
|                        | 1980-89       | 4669           | 32.3     | 1.8       | (1.7, 2.0)    |
|                        | 1990-99       | 5279           | 33.9     | 1.9       | (1.7, 2.1)    |
| Cancer -related pain   | 1970-79       | 4618           | 9.6      | 1.0       |               |
|                        | 1980-89       | 4669           | 10.7     | 1.1       | (1.0, 1.3)    |
|                        | 1990-99       | 5279           | 12.0     | 1.3       | (1.1, 1.4)    |
| Cancer-related anxiety | 1970-79       | 4618           | 13.3     | 1.0       |               |
|                        | 1980-89       | 4669           | 14.1     | 1.1       | (1.0, 1.2)    |
|                        | 1990-99       | 5279           | 15.0     | 1.1       | (1.0, 1.2)    |

N=Number, RR=relative risk, %=percent, CI=confidence interval

Adjusted for attained age, sex and race, sampling weights applied

**Supplemental Table 14. Percentage with adverse health status outcomes among survivors by diagnosis and treatment decade, RR (95% CI) for outcome, adjusted for attained age, survival time, race/ethnicity, and sex (decade), and additionally for treatment (decade-treatment) or grade 3-4 chronic conditions (decade-chronic conditions)**

|                              |         |      | Poor General Health |                       |                       |                            | Functional Impairment |                       |                       |                            | Activity Limitation |                       |                       |                            |
|------------------------------|---------|------|---------------------|-----------------------|-----------------------|----------------------------|-----------------------|-----------------------|-----------------------|----------------------------|---------------------|-----------------------|-----------------------|----------------------------|
|                              |         |      | %                   | Decade                | Decade + Treatment    | Decade + Chronic Condition | %                     | Decade                | Decade + Treatment    | Decade + Chronic Condition | %                   | Decade                | Decade + Treatment    | Decade + Chronic Condition |
| Diagnosis                    | Era     | N*   |                     | RR (95% CI)           | RR (95% CI)           | RR (95% CI)                |                       | RR (95% CI)           | RR (95% CI)           | RR (95% CI)                |                     | RR (95% CI)           | RR (95% CI)           | RR (95% CI)                |
| Acute lymphoblastic leukemia | 1970-79 | 1361 | 9.5                 | 1.0                   | 1.0                   | 1.0                        | 10.3                  | 1.0                   | 1.0                   | 1.0                        | 8.6                 | 1.0                   | 1.0                   | 1.0                        |
|                              | 1980-89 | 1714 | 9.9                 | 0.9 (0.8, 1.0)        | 0.9 (0.8, 1.0)        | 0.9 (0.8, 1.0)             | 8.5                   | 1.0 (0.8, 1.1)        | 1.0 (0.9, 1.2)        | 1.0 (0.9, 1.1)             | 8.4                 | 0.9 (0.8, 1.0)        | 0.9 (0.8, 1.0)        | 0.9 (0.8, 1.1)             |
|                              | 1990-99 | 2544 | 13.9                | <b>1.2 (1.1, 1.4)</b> | <b>1.1 (1.0, 1.3)</b> | <b>1.2 (1.1, 1.4)</b>      | 9.1                   | 0.9 (0.8, 1.1)        | 1.1 (0.9, 1.3)        | 1.0 (0.9, 1.1)             | 11.2                | 1.1 (1.0, 1.3)        | 1.3 (1.1, 1.5)        | 1.1 (1.0, 1.3)             |
| Astrocytoma                  | 1970-79 | 369  | 13.3                | 1.0                   | 1.0                   | 1.0                        | 33.4                  | 1.0                   | 1.0                   | 1.0                        | 21.1                | 1.0                   | 1.0                   | 1.0                        |
|                              | 1980-89 | 501  | 15.3                | 1.1 (0.9, 1.3)        | 1.3 (0.8, 2.0)        | 1.1 (0.9, 1.3)             | 28.9                  | 1.1 (1.0, 1.3)        | 0.9 (0.7, 1.1)        | 1.1 (1.0, 1.3)             | 15.4                | 1.0 (0.8, 1.2)        | 0.7 (0.5, 1.1)        | 1.0 (0.9, 1.2)             |
|                              | 1990-99 | 763  | 14.2                | 1.0 (0.8, 1.2)        | 1.4 (0.9, 2.2)        | 1.1 (0.9, 1.3)             | 18.1                  | <b>0.7 (0.6, 0.8)</b> | <b>0.7 (0.6, 0.9)</b> | <b>0.8 (0.7, 0.9)</b>      | 12.5                | <b>0.8 (0.7, 0.9)</b> | <b>0.8 (0.5, 1.2)</b> | <b>0.9 (0.7, 1.0)</b>      |
| Medullo-blastoma             | 1970-79 | 107  | 17.8                | 1.0                   | 1.0                   | 1.0                        | 45.8                  | 1.0                   | 1.0                   | 1.0                        | 17.9                | 1.0                   | 1.0                   | 1.0                        |
|                              | 1980-89 | 156  | 14.8                | 0.9 (0.7, 1.2)        | 0.8 (0.4, 1.4)        | 0.9 (0.7, 1.3)             | 28.6                  | 0.9 (0.7, 1.1)        | 0.7 (0.5, 1.0)        | 0.9 (0.7, 1.1)             | 12.4                | 0.8 (0.6, 1.0)        | 0.6 (0.3, 1.4)        | 0.8 (0.6, 1.1)             |
|                              | 1990-99 | 257  | 17.6                | 1.1 (0.8, 1.5)        | 0.7 (0.4, 1.4)        | 1.1 (0.8, 1.4)             | 26.5                  | 0.9 (0.8, 1.1)        | 0.7 (0.5, 1.1)        | 0.9 (0.7, 1.1)             | 19.5                | 1.3 (1.0, 1.7)        | 1.2 (0.5, 2.7)        | 1.3 (1.0, 1.7)             |
| Hodgkin lymphoma             | 1970-79 | 824  | 13.5                | 1.0                   | 1.0                   | 1.0                        | 7.5                   | 1.0                   | 1.0                   | 1.0                        | 12.3                | 1.0                   | 1.0                   | 1.0                        |
|                              | 1980-89 | 827  | 13.7                | 1.1 (0.9, 1.3)        | 1.3 (0.9, 1.8)        | 1.1 (0.9, 1.3)             | 6.4                   | 1.0 (0.8, 1.3)        | 1.1 (0.6, 1.9)        | 1.0 (0.8, 1.3)             | 10.2                | 1.0 (0.8, 1.2)        | 1.0 (0.7, 1.5)        | 1.0 (0.8, 1.2)             |
|                              | 1990-99 | 771  | 15.3                | 1.1 (0.9, 1.2)        | 0.9 (0.6, 1.5)        | 1.1 (1.0, 1.3)             | 7.9                   | 1.1 (0.9, 1.4)        | 1.0 (0.5, 1.9)        | 1.2 (1.0, 1.5)             | 11.2                | 1.0 (0.8, 1.2)        | 0.8 (0.5, 1.3)        | 1.1 (0.9, 1.3)             |
| Non-Hodgkin lymphoma         | 1970-79 | 347  | 10.8                | 1.0                   | 1.0                   | 1.0                        | 6.2                   | 1.0                   | 1.0                   | 1.0                        | 9.2                 | 1.0                   | 1.0                   | 1.0                        |
|                              | 1980-89 | 517  | 11.3                | 1.0 (0.9, 1.3)        | 1.1 (0.8, 1.4)        | 1.1 (0.8, 1.3)             | 9.0                   | 1.1 (0.9, 1.4)        | 1.2 (0.9, 1.6)        | 1.1 (0.9, 1.4)             | 9.3                 | 1.0 (0.8, 1.3)        | 1.1 (0.8, 1.4)        | 1.0 (0.8, 1.3)             |
|                              | 1990-99 | 566  | 11.7                | 1.1 (0.9, 1.3)        | 1.1 (0.8, 1.5)        | 1.2 (0.9, 1.5)             | 10.5                  | 1.3 (1.0, 1.6)        | 1.5 (1.1, 2.2)        | 1.4 (1.1, 1.8)             | 9.6                 | 1.0 (0.8, 1.3)        | 1.2 (0.8, 1.6)        | 1.1 (0.9, 1.4)             |
| Wilms tumor                  | 1970-79 | 398  | 8.0                 | 1.0                   | 1.0                   | 1.0                        | 6.9                   | 1.0                   | 1.0                   | 1.0                        | 7.9                 | 1.0                   | 1.0                   | 1.0                        |
|                              | 1980-89 | 259  | 5.9                 | 0.7 (0.5, 1.1)        | 0.7 (0.5, 1.1)        | 0.7 (0.5, 1.1)             | 5.8                   | 1.0 (0.7, 1.5)        | 1.0 (0.6, 1.6)        | 1.0 (0.7, 1.6)             | 9.7                 | 1.2 (0.9, 1.6)        | 1.2 (0.9, 1.7)        | 1.2 (0.9, 1.6)             |
|                              | 1990-99 | 427  | 9.4                 | 1.4 (1.0, 1.9)        | 1.4 (1.0, 2.0)        | 1.5 (1.1, 2.1)             | 4.0                   | 0.7 (0.4, 1.0)        | 0.7 (0.4, 1.0)        | 0.7 (0.5, 1.1)             | 6.6                 | 0.9 (0.7, 1.3)        | 1.0 (0.7, 1.3)        | 1.0 (0.7, 1.3)             |
| Neuro-blastoma               | 1970-79 | 289  | 9.1                 | 1.0                   | 1.0                   | 1.0                        | 8.0                   | 1.0                   | 1.0                   | 1.0                        | 11.3                | 1.0                   | 1.0                   | 1.0                        |
|                              | 1980-89 | 177  | 14.3                | 1.2 (0.9, 1.6)        | 1.2 (0.9, 1.7)        | 1.2 (0.9, 1.6)             | 12.5                  | 1.3 (0.9, 1.8)        | 1.1 (0.7, 1.7)        | 1.2 (0.9, 1.7)             | 12.2                | 1.1 (0.8, 1.5)        | 1.1 (0.7, 1.6)        | 1.1 (0.8, 1.5)             |
|                              | 1990-99 | 247  | 12.3                | 1.1 (0.8, 1.5)        | 0.9 (0.7, 1.3)        | 1.1 (0.8, 1.6)             | 9.5                   | 0.9 (0.6, 1.3)        | 0.7 (0.5, 1.2)        | 1.0 (0.7, 1.3)             | 10.2                | 0.8 (0.6, 1.2)        | 0.8 (0.5, 1.3)        | 0.9 (0.6, 1.2)             |
| Rhabdomyo-sarcoma            | 1970-79 | 287  | 11.6                | 1.0                   | 1.0                   | 1.0                        | 11.8                  | 1.0                   | 1.0                   | 1.0                        | 10.5                | 1.0                   | 1.0                   | 1.0                        |
|                              | 1980-89 | 233  | 13.5                | 1.2 (0.9, 1.6)        | 1.6 (0.8, 3.2)        | 1.2 (0.9, 1.6)             | 12.8                  | 1.1 (0.9, 1.5)        | 1.8 (0.9, 3.6)        | 1.1 (0.9, 1.5)             | 7.1                 | 0.8 (0.5, 1.1)        | 0.8 (0.3, 1.8)        | 0.8 (0.5, 1.1)             |
|                              | 1990-99 | 232  | 9.9                 | 0.9 (0.7, 1.2)        | 1.3 (0.7, 2.6)        | 0.9 (0.7, 1.3)             | 11.4                  | 1.0 (0.7, 1.3)        | 1.5 (0.8, 2.9)        | 1.0 (0.7, 1.3)             | 9.9                 | 1.1 (0.8, 1.5)        | 1.3 (0.6, 2.7)        | 1.1 (0.8, 1.5)             |
| Ewing sarcoma                | 1970-79 | 142  | 16.2                | 1.0                   | 1.0                   | 1.0                        | 16.0                  | 1.0                   | 1.0                   | 1.0                        | 26.8                | 1.0                   | 1.0                   | 1.0                        |
|                              | 1980-89 | 198  | 12.2                | 0.9 (0.7, 1.3)        | 0.5 (0.2, 1.2)        | 0.9 (0.7, 1.3)             | 15.8                  | 1.0 (0.8, 1.4)        | 1.1 (0.5, 2.3)        | 1.0 (0.7, 1.3)             | 18.5                | 0.8 (0.6, 1.0)        | 0.6 (0.4, 1.0)        | 0.8 (0.6, 1.0)             |
|                              | 1990-99 | 181  | 10.5                | 0.8 (0.6, 1.2)        | 0.6 (0.3, 1.3)        | 0.8 (0.6, 1.2)             | 16.2                  | 1.1 (0.8, 1.5)        | 1.2 (0.5, 2.6)        | 1.2 (0.9, 1.6)             | 24.8                | 1.1 (0.9, 1.3)        | 0.9 (0.5, 1.4)        | 1.1 (0.9, 1.4)             |
| Osteosarcoma                 | 1970-79 | 295  | 12.8                | 1.0                   | 1.0                   | 1.0                        | 17.7                  | 1.0                   | 1.0                   | 1.0                        | 28.1                | 1.0                   | 1.0                   | 1.0                        |
|                              | 1980-89 | 375  | 9.4                 | 0.8 (0.6, 1.1)        | 0.7 (0.4, 1.3)        | 0.8 (0.6, 1.1)             | 16.5                  | 0.9 (0.8, 1.1)        | 1.1 (0.7, 1.7)        | 1.0 (0.8, 1.2)             | 26.6                | 0.9 (0.8, 1.1)        | 0.9 (0.7, 1.3)        | 0.9 (0.8, 1.1)             |
|                              | 1990-99 | 302  | 16.3                | <b>1.4 (1.1, 1.7)</b> | <b>1.1 (0.6, 2.1)</b> | <b>1.4 (1.1, 1.8)</b>      | 21.7                  | 1.2 (1.0, 1.4)        | 1.6 (1.0, 2.6)        | 1.2 (1.0, 1.5)             | 34.1                | 1.2 (1.0, 1.4)        | 1.2 (0.8, 1.7)        | <b>1.2 (1.1, 1.4)</b>      |



**Table 14 (continued). Percentage with adverse health status outcomes among survivors by diagnosis and treatment decade, RR (95% CI) for outcome, adjusted for attained age, survival time, race/ethnicity, and sex (decade), and additionally for treatment (decade-treatment) or grade 3-4 chronic conditions (decade-chronic conditions)**

|                              |         |      | Poor Mental Health |                       |                       |                            | Pain |                       |                       |                            | Anxiety |                       |                       |                            |
|------------------------------|---------|------|--------------------|-----------------------|-----------------------|----------------------------|------|-----------------------|-----------------------|----------------------------|---------|-----------------------|-----------------------|----------------------------|
|                              |         |      | %                  | Decade                | Decade + Treatment    | Decade + Chronic Condition | %    | Decade                | Decade + Treatment    | Decade + Chronic Condition | %       | Decade                | Decade + Treatment    | Decade + Chronic Condition |
| Diagnosis                    | Era     | N*   |                    | RR (95% CI)           | RR (95% CI)           | RR (95% CI)                |      | RR (95% CI)           | RR (95% CI)           | RR (95% CI)                |         | RR (95% CI)           | RR (95% CI)           | RR (95% CI)                |
| Acute lymphoblastic leukemia | 1970-79 | 1361 | 17.3               | 1.0                   | 1.0                   | 1.0                        | 7.5  | 1.0                   | 1.0                   | 1.0                        | 11.3    | 1.0                   | 1.0                   | 1.0                        |
|                              | 1980-89 | 1714 | 16.3               | 0.9 (0.8, 1.0)        | 0.9 (0.8, 1.0)        | 0.9 (0.9, 1.0)             | 9.5  | 1.0 (0.9, 1.1)        | 0.9 (0.8, 1.1)        | 1.0 (0.9, 1.2)             | 12.2    | 0.9 (0.9, 1.1)        | 1.0 (0.9, 1.1)        | 1.0 (0.9, 1.1)             |
|                              | 1990-99 | 2544 | 19.3               | 1.1 (1.0, 1.2)        | 1.1 (1.0, 1.2)        | 1.1 (1.0, 1.2)             | 13.7 | <b>1.3 (1.1, 1.4)</b> | <b>1.2 (1.0, 1.4)</b> | <b>1.3 (1.1, 1.5)</b>      | 16.1    | <b>1.2 (1.1, 1.3)</b> | <b>1.2 (1.1, 1.4)</b> | <b>1.2 (1.1, 1.3)</b>      |
| Astrocytoma                  | 1970-79 | 369  | 18.4               | 1.0                   | 1.0                   | 1.0                        | 8.5  | 1.0                   | 1.0                   | 1.0                        | 12.9    | 1.0                   | 1.0                   | 1.0                        |
|                              | 1980-89 | 501  | 22.1               | 1.1 (1.0, 1.3)        | 1.1 (0.8, 1.5)        | 1.2 (1.0, 1.3)             | 13.6 | 1.3 (1.1, 1.6)        | 1.7 (1.0, 2.8)        | 1.3 (1.1, 1.6)             | 14.5    | 1.1 (0.9, 1.3)        | 1.0 (0.7, 1.6)        | 1.1 (0.9, 1.3)             |
|                              | 1990-99 | 763  | 17.6               | 0.9 (0.8, 1.0)        | 0.9 (0.6, 1.2)        | 0.9 (0.8, 1.1)             | 10.7 | 1.0 (0.8, 1.2)        | 1.2 (0.7, 2.1)        | 1.1 (0.9, 1.3)             | 10.9    | 0.8 (0.7, 1.0)        | 0.8 (0.5, 1.2)        | 0.9 (0.7, 1.0)             |
| Medullo-blastoma             | 1970-79 | 107  | 26.3               | 1.0                   | 1.0                   | 1.0                        | 12.6 | 1.0                   | 1.0                   | 1.0                        | 14.3    | 1.0                   | 1.0                   | 1.0                        |
|                              | 1980-89 | 156  | 14.0               | 0.8 (0.6, 1.0)        | 0.6 (0.4, 1.1)        | 0.8 (0.6, 1.1)             | 5.8  | 0.7 (0.4, 1.1)        | 0.4 (0.1, 1.1)        | 0.7 (0.4, 1.2)             | 11.9    | 1.0 (0.7, 1.4)        | 0.8 (0.4, 1.6)        | 1.0 (0.7, 1.5)             |
|                              | 1990-99 | 257  | 17.3               | 1.0 (0.8, 1.3)        | 0.8 (0.4, 1.4)        | 1.0 (0.8, 1.3)             | 7.0  | 1.0 (0.6, 1.6)        | 0.5 (0.2, 1.5)        | 1.0 (0.6, 1.6)             | 9.8     | 0.8 (0.6, 1.2)        | 0.4 (0.1, 1.1)        | 0.8 (0.6, 1.1)             |
| Hodgkin lymphoma             | 1970-79 | 824  | 18.4               | 1.0                   | 1.0                   | 1.0                        | 6.4  | 1.0                   | 1.0                   | 1.0                        | 16.0    | 1.0                   | 1.0                   | 1.0                        |
|                              | 1980-89 | 827  | 18.5               | 1.1 (1.0, 1.2)        | 1.0 (0.7, 1.3)        | 1.1 (1.0, 1.2)             | 6.2  | 1.0 (0.8, 1.3)        | 1.3 (0.8, 2.3)        | 1.0 (0.8, 1.3)             | 17.3    | 1.1 (1.0, 1.2)        | 1.1 (0.8, 1.5)        | 1.1 (1.0, 1.2)             |
|                              | 1990-99 | 771  | 15.8               | 0.9 (0.8, 1.0)        | 0.6 (0.4, 0.9)        | 0.9 (0.8, 1.1)             | 8.1  | 1.3 (1.0, 1.6)        | 1.5 (0.8, 3.0)        | 1.4 (1.1, 1.7)             | 18.8    | 1.1 (1.0, 1.3)        | 1.0 (0.6, 1.4)        | 1.1 (1.0, 1.3)             |
| Non-Hodgkin lymphoma         | 1970-79 | 347  | 17.7               | 1.0                   | 1.0                   | 1.0                        | 8.1  | 1.0                   | 1.0                   | 1.0                        | 11.8    | 1.0                   | 1.0                   | 1.0                        |
|                              | 1980-89 | 517  | 17.4               | 1.0 (0.8, 1.2)        | 1.1 (0.9, 1.4)        | 1.0 (0.8, 1.2)             | 9.1  | 1.1 (0.9, 1.4)        | 1.3 (0.9, 1.7)        | 1.1 (0.9, 1.4)             | 12.6    | 1.0 (0.8, 1.2)        | 1.0 (0.7, 1.2)        | 1.0 (0.8, 1.2)             |
|                              | 1990-99 | 566  | 17.1               | 1.0 (0.8, 1.1)        | 1.0 (0.8, 1.4)        | 1.0 (0.8, 1.2)             | 8.9  | 1.1 (0.8, 1.4)        | 1.0 (0.7, 1.4)        | 1.1 (0.9, 1.5)             | 14.7    | 1.2 (1.0, 1.4)        | 1.1 (0.8, 1.5)        | 1.2 (1.0, 1.4)             |
| Wilms tumor                  | 1970-79 | 398  | 14.4               | 1.0                   | 1.0                   | 1.0                        | 7.8  | 1.0                   | 1.0                   | 1.0                        | 9.5     | 1.0                   | 1.0                   | 1.0                        |
|                              | 1980-89 | 259  | 13.6               | 0.9 (0.7, 1.2)        | 0.9 (0.7, 1.1)        | 0.9 (0.7, 1.2)             | 3.1  | 0.6 (0.4, 1.0)        | 0.6 (0.4, 1.0)        | 0.6 (0.4, 1.0)             | 12.6    | 1.2 (0.9, 1.5)        | 1.1 (0.8, 1.4)        | 1.2 (0.9, 1.5)             |
|                              | 1990-99 | 427  | 15.1               | 1.1 (0.9, 1.3)        | 1.0 (0.8, 1.3)        | 1.1 (0.9, 1.4)             | 5.2  | 1.1 (0.7, 1.6)        | 0.9 (0.6, 1.4)        | 1.1 (0.7, 1.6)             | 9.7     | 1.0 (0.7, 1.2)        | 1.0 (0.8, 1.3)        | 1.0 (0.8, 1.3)             |
| Neuro-blastoma               | 1970-79 | 289  | 15.4               | 1.0                   | 1.0                   | 1.0                        | 7.4  | 1.0                   | 1.0                   | 1.0                        | 11.1    | 1.0                   | 1.0                   | 1.0                        |
|                              | 1980-89 | 177  | 18.3               | 1.4 (1.0, 1.8)        | 1.7 (1.2, 2.5)        | 1.3 (1.0, 1.8)             | 9.4  | 1.2 (0.8, 1.8)        | 1.3 (0.8, 2.1)        | 1.1 (0.7, 1.7)             | 11.4    | 1.0 (0.7, 1.4)        | 1.1 (0.7, 1.6)        | 1.0 (0.7, 1.4)             |
|                              | 1990-99 | 247  | 11.6               | 0.7 (0.5, 0.9)        | 0.6 (0.4, 0.8)        | 0.7 (0.5, 0.9)             | 7.3  | 0.9 (0.5, 1.3)        | 1.0 (0.6, 1.6)        | 0.9 (0.6, 1.4)             | 9.0     | 0.9 (0.6, 1.3)        | 0.9 (0.6, 1.3)        | 0.9 (0.6, 1.3)             |
| Rhabdomyosarcoma             | 1970-79 | 287  | 17.7               | 1.0                   | 1.0                   | 1.0                        | 14.6 | 1.0                   | 1.0                   | 1.0                        | 16.7    | 1.0                   | 1.0                   | 1.0                        |
|                              | 1980-89 | 233  | 17.7               | 1.1 (0.8, 1.3)        | 1.0 (0.6, 1.6)        | 1.0 (0.8, 1.3)             | 14.5 | 1.1 (0.8, 1.4)        | 1.2 (0.7, 2.0)        | 1.1 (0.8, 1.4)             | 18.0    | 1.1 (0.9, 1.4)        | 1.1 (0.7, 1.8)        | 1.1 (0.8, 1.3)             |
|                              | 1990-99 | 232  | 15.6               | 0.9 (0.7, 1.2)        | 0.8 (0.5, 1.3)        | 0.9 (0.7, 1.2)             | 11.3 | 0.8 (0.6, 1.1)        | 0.9 (0.5, 1.5)        | 0.8 (0.6, 1.1)             | 14.4    | 0.9 (0.7, 1.1)        | 0.9 (0.5, 1.4)        | 0.9 (0.7, 1.2)             |
| Ewing sarcoma                | 1970-79 | 142  | 17.7               | 1.0                   | 1.0                   | 1.0                        | 21.4 | 1.0                   | 1.0                   | 1.0                        | 23.0    | 1.0                   | 1.0                   | 1.0                        |
|                              | 1980-89 | 198  | 17.8               | 1.0 (0.8, 1.3)        | 1.4 (0.7, 2.6)        | 1.0 (0.8, 1.3)             | 21.0 | 1.0 (0.8, 1.2)        | 1.0 (0.6, 1.7)        | 0.9 (0.7, 1.2)             | 14.1    | 0.8 (0.6, 1.0)        | 0.7 (0.4, 1.3)        | 0.8 (0.6, 1.0)             |
|                              | 1990-99 | 181  | 19.5               | 1.1 (0.8, 1.4)        | 1.6 (0.9, 3.1)        | 1.1 (0.8, 1.4)             | 24.2 | 1.1 (0.9, 1.4)        | 1.2 (0.7, 2.1)        | 1.1 (0.9, 1.4)             | 20.1    | 1.1 (0.8, 1.4)        | 1.0 (0.6, 1.9)        | 1.1 (0.8, 1.4)             |
| Osteosarcoma                 | 1970-79 | 295  | 16.8               | 1.0                   | 1.0                   | 1.0                        | 23.9 | 1.0                   | 1.0                   | 1.0                        | 13.5    | 1.0                   | 1.0                   | 1.0                        |
|                              | 1980-89 | 375  | 17.3               | 0.9 (0.7, 1.1)        | 0.9 (0.6, 1.4)        | 0.9 (0.7, 1.1)             | 23.4 | 0.9 (0.8, 1.0)        | 1.1 (0.8, 1.6)        | 0.9 (0.8, 1.1)             | 14.9    | 1.0 (0.8, 1.2)        | 1.1 (0.7, 1.8)        | 1.0 (0.8, 1.2)             |
|                              | 1990-99 | 302  | 24.8               | <b>1.3 (1.1, 1.5)</b> | <b>1.7 (1.0, 2.7)</b> | <b>1.3 (1.1, 1.5)</b>      | 36.6 | <b>1.4 (1.2, 1.6)</b> | <b>1.6 (1.1, 2.4)</b> | <b>1.4 (1.3, 1.7)</b>      | 19.5    | 1.3 (1.0, 1.5)        | 1.4 (0.8, 2.4)        | 1.3 (1.0, 1.6)             |

%=percent, RR=relative risk, CI=confidence interval

Regression models used a binomial distribution with a log link. All models adjusted for attained age, survival time, sex, race and sampling weights. Model fit was assessed by examining Akaike Information Criteria. Final models all had AIC differences (when compared to a model adjusted only for attained age, survival time, sex, race and sampling weights) of  $\geq 10$ , N\*=number – displayed Ns for acute lymphoblastic leukemia survivors are weighted. **Bold text indicates RR estimates with  $p < 0.05$**
